# Supplementary material for: Comparative Genomics Suggests an Independent Origin of Cytoplasmic Incompatibility in Cardinium hertigii
Source: PLoS Genet. 2012 Oct 25;8(10):e1003012. doi: 10.1371/journal.pgen.1003012 (PMC3486910; doi:10.1371/journal.pgen.1003012)
Supplement: Figure S2 — Conservation of the RING-like domain encoded in CAHE_p0026. Comparison of the domain found in CAHE_p0026 with RING-like domains showing E3 ubiquitin ligase activity according to [44]. The domains RING-HC and RING-H2 represent the two major subcategories of RING finger domains (depending on whether a Cys or His occupies the fifth coordination site); Mdm2, murine double minute 2 protein; RBQ-1, retinoblastoma binding protein 6 (RBBP6); RBX1, RING-box protein 1; Cnot4, CCR4-NOT transcription complex subunit 4. Only conserved amino acid residues indicative for the RING finger domain are shown. Cys, cysteine; His, histidine; X, any amino acid; subscript number corresponds to number of amino acid. (PDF) [file pgen.1003012.s002.pdf]

|               |                                                  |                           |                            |                                                    |                              |
|---------------|--------------------------------------------------|---------------------------|----------------------------|----------------------------------------------------|------------------------------|
| CAHE_p0026    | Cys - X <sub>2</sub> - Cys - X <sub>18</sub>     | - Cys- X <sub>1</sub>     | - His - X <sub>2</sub>     | - His - X <sub>2</sub> - Cys - X <sub>16</sub>     | - Cys - X <sub>2</sub> - Cys |
| RING-HC       | Cys - X <sub>2</sub> - Cys - X <sub>(9-39)</sub> | - Cys- X <sub>(1-3)</sub> | - His - X <sub>(2-3)</sub> | - Cys - X <sub>2</sub> - Cys - X <sub>(4-48)</sub> | - Cys - X <sub>2</sub> - Cys |
| RING-H2       | Cys - X <sub>2</sub> - Cys - X <sub>(9-39)</sub> | - Cys- X <sub>(1-3)</sub> | - His - X <sub>(2-3)</sub> | - His - X <sub>2</sub> - Cys - X <sub>(4-48)</sub> | - Cys - X <sub>2</sub> - Cys |
| C2H2C4 (Mdm2) | Cys - X <sub>2</sub> - Cys - X <sub>10</sub>     | - His- X <sub>4</sub>     | - His - X <sub>3</sub>     | - Cys - X <sub>2</sub> - Cys - X <sub>10</sub>     | - Cys - X <sub>2</sub> - Cys |
| RBQ-1         | Cys - X <sub>2</sub> - Cys - X <sub>11</sub>     | - Cys- X <sub>2</sub>     | - Asn- X <sub>3</sub>      | - Cys - X <sub>2</sub> - Cys - X <sub>12</sub>     | - Cys - X <sub>2</sub> - Cys |
| RBX1          | Cys - X <sub>2</sub> - Cys - X <sub>29</sub>     | - Cys- X <sub>1</sub>     | - His - X <sub>2</sub>     | - His - X <sub>2</sub> - Cys - X <sub>10</sub>     | - Cys - X <sub>2</sub> - Cys |
| C4H4 (Cnot4)  | Cys - X <sub>2</sub> - Cys - X <sub>13</sub>     | - Cys- X <sub>1</sub>     | - Cys- X <sub>4</sub>      | - Cys - X <sub>2</sub> - Cys - X <sub>11</sub>     | - Cys - X <sub>2</sub> - Cys |
